# Supplementary material
Source: ML conference proceedings conference paper supplement (https://openreview.net/forum?id=duBoAyn9aI)
Supplement: supplementary_material [file attachment]

# Supplementary Material

---

Paper ID: 3828

Title: **Controllable and Lossless Non-Autoregressive End-to-End Text-to-Speech**

## Code

---

The key part of the code.

## Sample

---

Audio generated by different models:

- `sample/MOS`: Samples of MOS testing data in section 4.5.1
- `sample/CMOS`: Samples of CMOS testing data in section 4.5.1
- `sample/Prosody/sample`: Samples of prosody variation in section 4.5.1 (Prosody Variation)
- `sample/Prosody/transfer`: Samples of prosody transfer in section 4.5.1 (Prosody Transfer)
- `sample/Prosody/reconstruction`: Samples of prosody reconstruction in section 4.5.1 (Prosody reconstruction)

## Appendix

---

Appendix of the paper, including limitations and societal impact, details of formula, hyperparameter and model configuration of CLONE.
