# Supplementary material
Source: ML conference proceedings conference paper supplement (https://openreview.net/forum?id=duBoAyn9aI)
Supplement: supplementary_material [file attachment]

## 492 A Limitations and Societal Impact

493 **Limitations** The training time of CLONE is relatively long, especially the 48 kHz CLONE. In  
 494 addition, the amount of parameters of CLONE is relatively large. CLONE still has room for  
 495 compression to be more suitable for on-device deployment.

496 **Societal Impact** CLONE can generate high-quality speech with better prosody. Thus, CLONE can  
 497 be applied to any scenario requiring speech synthesis, especially scenarios requiring more prosody  
 498 and emotional changes, such as video dubbing and speech synthesis for the virtual human. However,  
 499 CLONE can also be abused to generate fake audios or videos, causing adverse effects such as  
 500 telemarketing scams.

## 501 B Details of Formula

502 The derivation of the formula for KL divergence in prosody modeling is as follows:

$$\begin{aligned}\mathcal{L}_{kl} &= D_{kl}(q_\phi(z | x, c) || p_\theta(z | c)) \\ &= \mathbb{E}_{q_\phi(z|x,c)} [\log q_\phi(z | x, c) - \log p_\theta(z | c)] \\ &= \mathbb{E}_{q_\phi(z|x,c)} [\log q_\phi(z | x, c)] - \mathbb{E}_{q_\phi(z|x,c)} [\log p_\theta(z | c)],\end{aligned}\tag{11}$$

503 as we assume that the approximate posterior distribution of the phoneme-level prosody latent variable  
 504  $z$  is a normal distribution rather than a standard normal distribution, we have the follows:

$$q_\phi(z | x, c) \sim \mathcal{N}(\mu_\phi, \sigma_\phi),\tag{12}$$

505 and the differential entropy for a univariate normal distribution  $p(x) \sim \mathcal{N}(\mu, \sigma)$  is as follows:

$$\mathbb{E}[-\log p(x)] = \log(\sigma * \sqrt{2\pi e}).\tag{13}$$

506 Thus, we have:

$$\mathbb{E}_{q_\phi(z|x,c)} [\log q_\phi(z | x, c)] = -\log(\sigma_\phi * \sqrt{2\pi e}).\tag{14}$$

507 Besides,  $\mathbb{E}_{q_\phi(z|x,c)} [\log p_\theta(z | c)]$  does not have a closed-form solution. So we compute  $\log p_\theta(z | c)$   
 508 for each sampled  $z$  and then average them. For each sampling, we have:

$$\begin{aligned}\mathbb{E}_{q_\phi(z|x,c)} [\log p_\theta(z | c)] &= \mathbb{E}_{q_\phi(z|x,c)} \left[ \log \left( \mathcal{N}(f_\theta(z); \mathbf{0}, \mathbf{I}) \cdot \left| \det \frac{\partial f_\theta(z)}{\partial z} \right| \right) \right] \\ &= -\frac{\log(2\pi)}{2} - \frac{f_\theta(z)^2}{2} + \log \left( \left| \det \frac{\partial f_\theta(z)}{\partial z} \right| \right),\end{aligned}\tag{15}$$

509 where  $z \sim q_\phi(z | x, c)$ . Thus, we have:

$$\begin{aligned}\mathcal{L}_{kl} &= \mathbb{E}_{q_\phi(z|x,c)} [\log q_\phi(z | x, c)] - \mathbb{E}_{q_\phi(z|x,c)} [\log p_\theta(z | c)] \\ &= -\log(\sigma_\phi * \sqrt{2\pi e}) + \frac{\log(2\pi)}{2} + \frac{f_\theta(z)^2}{2} - \log \left( \left| \det \frac{\partial f_\theta(z)}{\partial z} \right| \right) \\ &= -\log(\sigma_\phi) - \frac{1}{2} + \frac{f_\theta(z)^2}{2} - \log \left( \left| \det \frac{\partial f_\theta(z)}{\partial z} \right| \right).\end{aligned}\tag{16}$$

510 The training loss of the prosody predictor is the KL divergence between two normal distributions  
 511 which are the distribution of prosody predictor  $s_\psi(z | t) \sim \mathcal{N}(\mu_{pp}, \sigma_{pp})$  and the distribution of  
 512 posterior encoder  $q_\phi(z | x, c) \sim \mathcal{N}(\mu_\phi, \sigma_\phi)$ , respectively. As KL divergence between two normal  
 513 distributions has closed-form solution, we have:

$$\begin{aligned}
\mathcal{L}_{pp} &= D_{kl}(\mathcal{N}(\mu_{pp}, \sigma_{pp}), \mathcal{N}(\mu_\phi, \sigma_\phi)) \\
&= \frac{1}{2} \log(2\pi\sigma_\phi^2) + \frac{\sigma_{pp}^2 + (\mu_{pp} - \mu_\phi)^2}{2\sigma_\phi^2} - \frac{1}{2} (1 + \log(2\pi\sigma_{pp}^2)) \\
&= \log \frac{\sigma_\phi}{\sigma_{pp}} + \frac{\sigma_{pp}^2 + (\mu_{pp} - \mu_\phi)^2}{2\sigma_\phi^2} - \frac{1}{2}.
\end{aligned} \tag{17}$$

## 514 C Hyperparameter and Model Configuration of CLONE

515 We list the hyperparameters of each module of CLONE as shown in Table 4.

Table 4: The hyperparameter and model configurations of CLONE.

| Module                                      | Parameter                        |
|---------------------------------------------|----------------------------------|
| Speaker Embedding Size                      | 256                              |
| Text Encoder                                |                                  |
| Phoneme Embedding Size                      | 192                              |
| Feed-Forward Transformer Layers             | 6                                |
| Feed-Forward Transformer Hidden Channels    | 192                              |
| Feed-Forward Transformer Conv1D Kernel Size | 3                                |
| Feed-Forward Transformer Conv1D Filter Size | 768                              |
| Feed-Forward Transformer Attention Heads    | 2                                |
| Prosody Predictor                           |                                  |
| Dilated CNN Layers                          | 4                                |
| Dilated CNN Hidden Channels                 | 192                              |
| Dilated CNN Kernel Size                     | 5                                |
| Dilated CNN Dilation Rate                   | 1                                |
| Duration Predictor                          |                                  |
| Conv1D Kernel Size                          | 3                                |
| Conv1D Filter Size                          | 256                              |
| Posterior Encoder                           |                                  |
| Dilated CNN Layers                          | 8                                |
| Dilated CNN Hidden Channels                 | 192                              |
| Dilated CNN Kernel Size                     | 5                                |
| Dilated CNN Dilation Rate                   | 1                                |
| Acoustic Encoder                            |                                  |
| Dilated CNN Layers                          | 8                                |
| Dilated CNN Hidden Channels                 | 192                              |
| Dilated CNN Kernel Size                     | 5                                |
| Dilated CNN Dilation Rate                   | 1                                |
| Posterior Wave Encoder                      |                                  |
| Dilated CNN Hidden Layers                   | 8                                |
| Dilated CNN Hidden Channels                 | 192                              |
| Dilated CNN Kernel Size                     | 5                                |
| Dilated CNN Dilation Rate                   | 1                                |
| Flow                                        |                                  |
| Flows                                       | 4                                |
| Residual Coupling Layers                    | 4                                |
| Residual Coupling Layer Hidden Size         | 192                              |
| Residual Coupling Layer Kernel Size         | 5                                |
| Residual Coupling Layer Dilation Rate       | 1                                |
| Multi-Band Discriminator                    |                                  |
| 24 kHz Model Band Number                    | 2                                |
| 48 kHz Model Band Number                    | 4                                |
| $\lambda$ of Loss Function                  |                                  |
| $\lambda_{[1 \rightarrow 6]}$               | [45.0, 1.0, 10.0, 0.1, 1.0, 1.0] |
