# Supplementary material
Source: ML conference proceedings conference paper supplement (https://openreview.net/forum?id=duBoAyn9aI)
Supplement: supplementary_material [file attachment]

# Code

---

Paper ID: 3828

Title: **Controllable and Lossless Non-Autoregressive End-to-End Text-to-Speech**

## Description

---

In order to make the reviewers better understand our work, we have given the key part of the code.

```
# Model architecture
```

```
CLONE.py
```

```
# Training strategy
```

```
train.py
```
