# Supplementary material
Source: ML conference proceedings conference paper supplement (https://openreview.net/forum?id=duBoAyn9aI)
Supplement: supplementary_material [file attachment]

## Sample

---

- [id]\_n1: audio generated by setting sample values to all  $-1$
- [id]\_1: audio generated by setting sample values to all  $1$

## Transfer

---

- [id]\_e2e: end-to-end synthesis result
- [id].wav: transfer result
- [id]\_ref: reference audio

## Reconstruction

---

- [id].wav: reconstruction result
- [id]\_ref.wav: reference audio
